# Supplementary material for: Evaluating the Performance of a Semiaromatic/Aliphatic Polyamide Blend: The Case for Polyphthalamide (PPA) and Polyamide 4,10 (PA410)
Source: MDPI journal article supplement (doi:10.3390/polym13193391), 2021-10-02
Supplement: s1 [file s1]

Supplementary Material

# Evaluating the Performance of a Semiaromatic/Aliphatic Polyamide Blend: The Case for Polyphthalamide (PPA) and Polyamide 4,10 (PA410)

Mateo Gonzalez de Gortari <sup>1,2</sup>, Feng Wu <sup>1</sup>, Amar K. Mohanty <sup>1,2</sup> and Manjusri Misra <sup>1,2,\*</sup>

<sup>1</sup> School of Engineering, Thornbrough Building, University of Guelph, Guelph, ON N1G 2W1, Canada; mgonza07@uoguelph.ca (M.G.d.G.); fengwu@uoguelph.ca (F.W.); mohanty@uoguelph.ca (A.K.M.)

<sup>2</sup> Bioproducts Discovery and Development Centre, Department of Plant Agriculture, Crop Science Building, University of Guelph, Guelph, ON N1G 2W1, Canada

\* Correspondence: mmisra@uoguelph.ca

**Citation:** de Gortari, M. G.; Wu, F.; Mohanty, A.K.; Misra, M. Evaluating the Performance of a Semiaromatic/Aliphatic Polyamide Blend: The Case for Polyphthalamide (PPA) and Polyamide 4,10 (PA410). *Polymers* **2021**, *13*, 3391. <https://doi.org/10.3390/polym13193391>

Academic Editor: Silvie Rimpelová

Received: 1 September 2021

Accepted: 28 September 2021

Published: 2 October 2021

**Publisher's Note:** MDPI stays neutral with regard to jurisdictional claims in published maps and institutional affiliations.

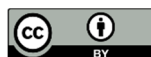

**Copyright:** © 2021 by the authors. Licensee MDPI, Basel, Switzerland. This article is an open access article distributed under the terms and conditions of the Creative Commons Attribution (CC BY) license (<http://creativecommons.org/licenses/by/4.0/>).

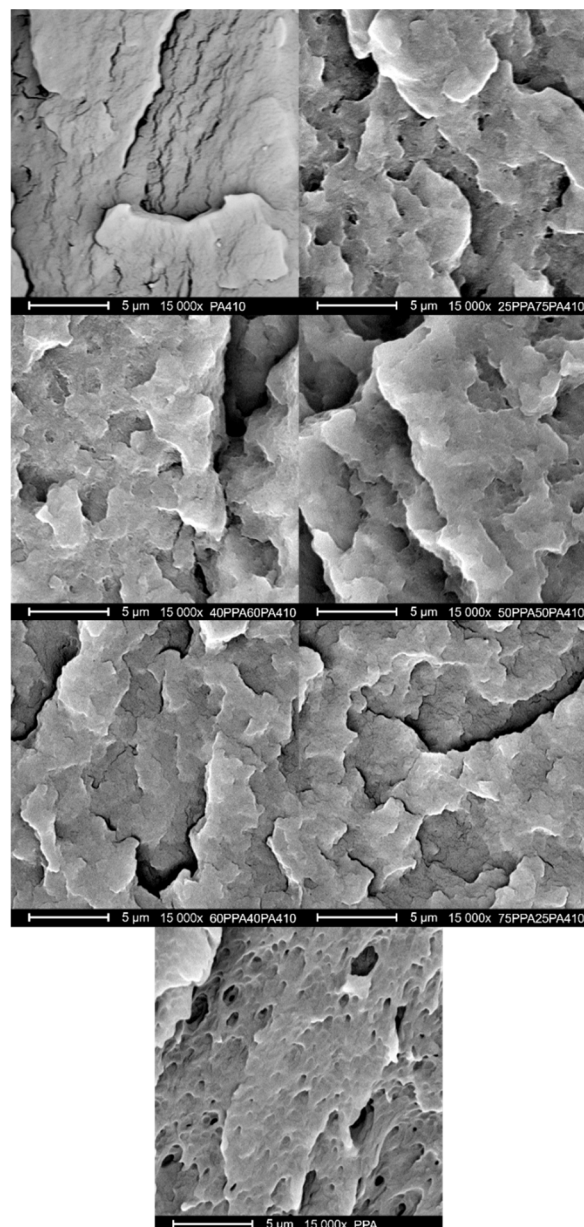

**Figure S1.** SEM images of gold-coated impact fracture samples of all PPA/PA410 blends.

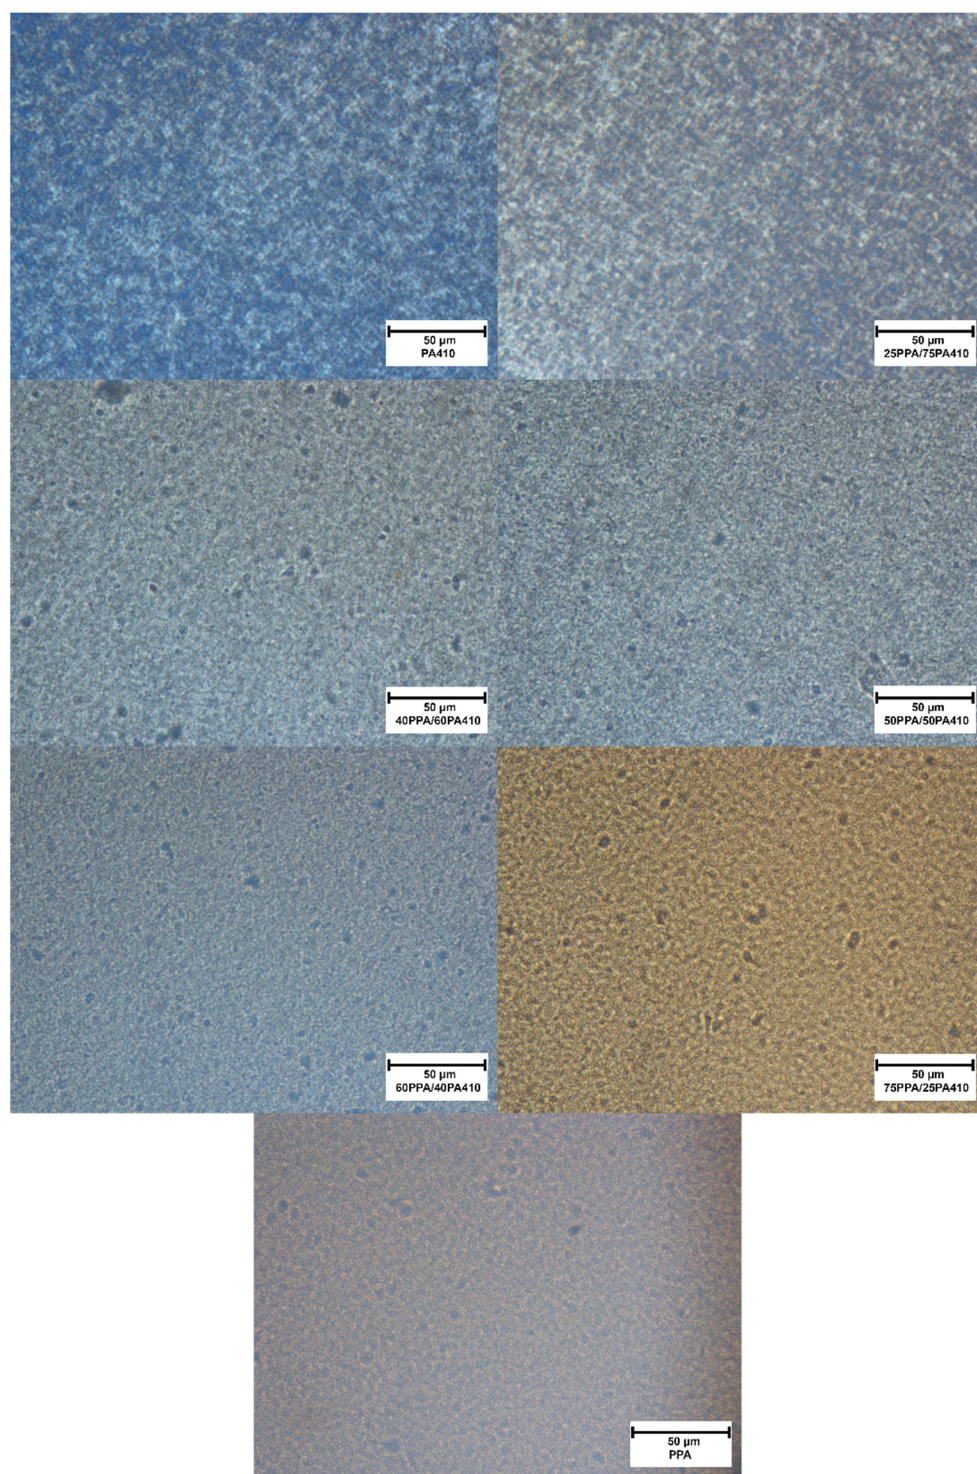

**Figure S2.** POM images of all PPA/PA410 blends.
